# Supplementary material for: Decreased YAP activity reduces proliferative ability in human induced pluripotent stem cell of duchenne muscular dystrophy derived cardiomyocytes
Source: PubMed Central journal article supplement (PMC8121946; doi:10.1038/s41598-021-89603-8), 2021-05-14
Supplement: 41598_2021_89603_MOESM9_ESM.pdf [file 41598_2021_89603_MOESM9_ESM.pdf]

## Supplementary Information

### Decreased YAP Activity Reduces Proliferative Ability in Human Induced Pluripotent Stem Cell of Duchenne Muscular Dystrophy Derived Cardiomyocytes

Hideki Yasutake<sup>1,2</sup>, Jong-Kook Lee<sup>2\*</sup>, Akihito Hashimoto<sup>1,3</sup>, Kiyoshi Masuyama<sup>1</sup>, Jun Li<sup>1,2</sup>, Yuki Kuramoto<sup>1</sup>, Shuichiro Higo<sup>4</sup>, Shungo Hikoso<sup>1</sup>, Kyoko Hidaka<sup>5</sup>, Atsuhiko T. Naito<sup>6</sup>, Shigeru Miyagawa<sup>7</sup>, Yoshiki Sawa<sup>7</sup>, Issei Komuro<sup>8</sup>, Yasushi Sakata<sup>1</sup>

<sup>1</sup>Department of Cardiovascular Medicine, Osaka University Graduate School of Medicine, 2-2 Yamadaoka, Suita 565-0871, Japan

<sup>2</sup>Department of Cardiovascular Regenerative Medicine, Osaka University Graduate School of Medicine, 2-2 Yamadaoka, Suita 565-0871, Japan

<sup>3</sup>Daihatsu Health Care Center, 2-1-1 Momozono, Ikeda 563-0045, Japan

<sup>4</sup>Department of Medical Therapeutics for Heart Failure, Osaka University Graduate School of Medicine, 2-2 Yamadaoka, Suita, Osaka 565-0871, Japan

<sup>5</sup>Center for Fundamental Education, The University of Kitakyushu, 4-2-1 Kokura Minami-ku Kitagata, Kitakyushu 802-8577, Japan

<sup>6</sup>Department of Physiology, Faculty of Medicine, Toho University, 5-21-16 Omori-nishi, Ohta-ku, Tokyo 143-8540, Japan

<sup>7</sup>Department of Cardiovascular Surgery, Osaka University Graduate School of Medicine, 2-2 Yamadaoka, Suita 565-0871, Japan

<sup>8</sup>Department of Cardiovascular Medicine, Graduate School of Medicine, The University of Tokyo, 7-3-1 Hongo, Bunkyo-ku, Tokyo 113-8655, Japan

**\*Correspondence:** Jong-Kook Lee, Department of Cardiovascular Regenerative Medicine, Osaka University Graduate School of Medicine, 2-2 Yamadaoka, Suita 565-0871, Japan, E-mail [jlee@cardiology.med.osaka-u.ac.jp](mailto:jlee@cardiology.med.osaka-u.ac.jp)

## Supplemental Figure

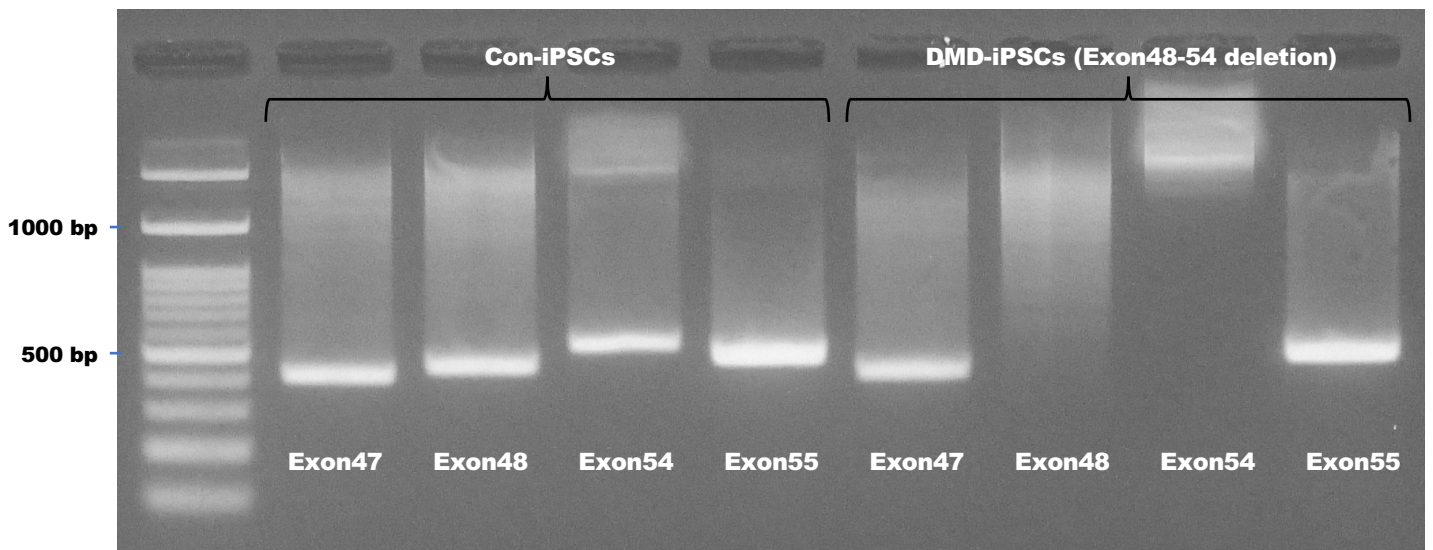

**Supplemental Figure I.** Genotyping of Con-iPSCs and DMD-iPSCs using PCR for each exon in DMD.

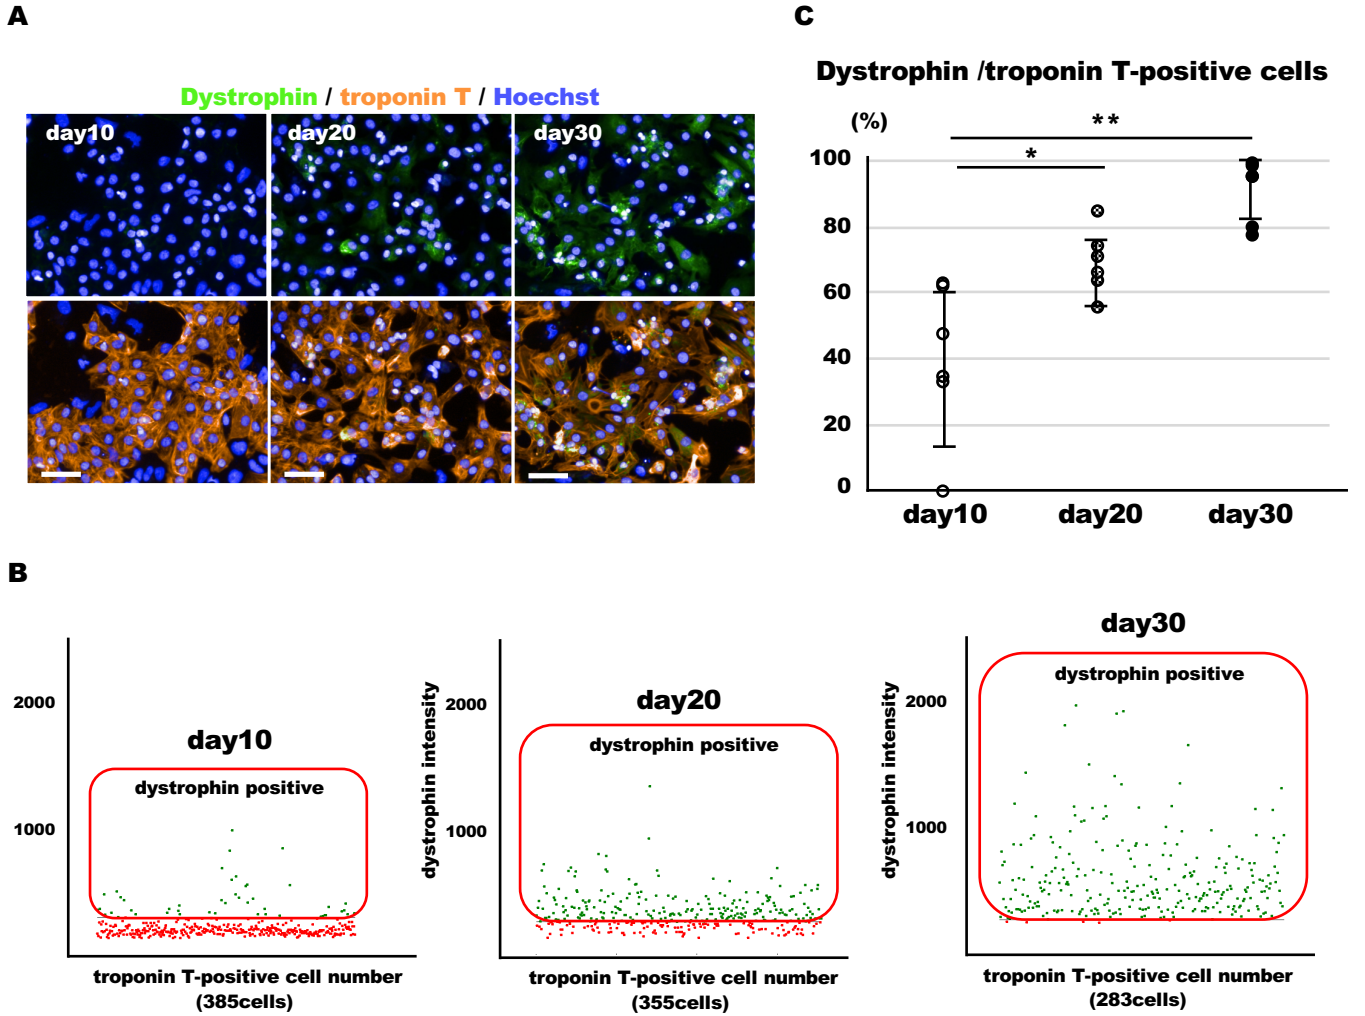

**Supplemental Figure II.** **A**, Dystrophin expression in Con-iPSC-CMs according to time course of cardiac differentiation demonstrated using immunofluorescence staining (Scale bar: 50  $\mu$ m). **B**, Scatter plots of one field in Con-iPSC-CMs according to the time course of cardiac differentiation. Red frames indicate dystrophin-positive cells in troponin T-positive cells. **C**, Percentage of dystrophin-positive cells in troponin T-positive cells was evaluated in Con-iPSC-CMs. (n = 6 sessions, mean analyzed troponin T-positive cell number =  $3202 \pm 1739$  cells, mean  $\pm$  SD; \* $P < 0.05$ , \*\* $P < 0.01$ ).

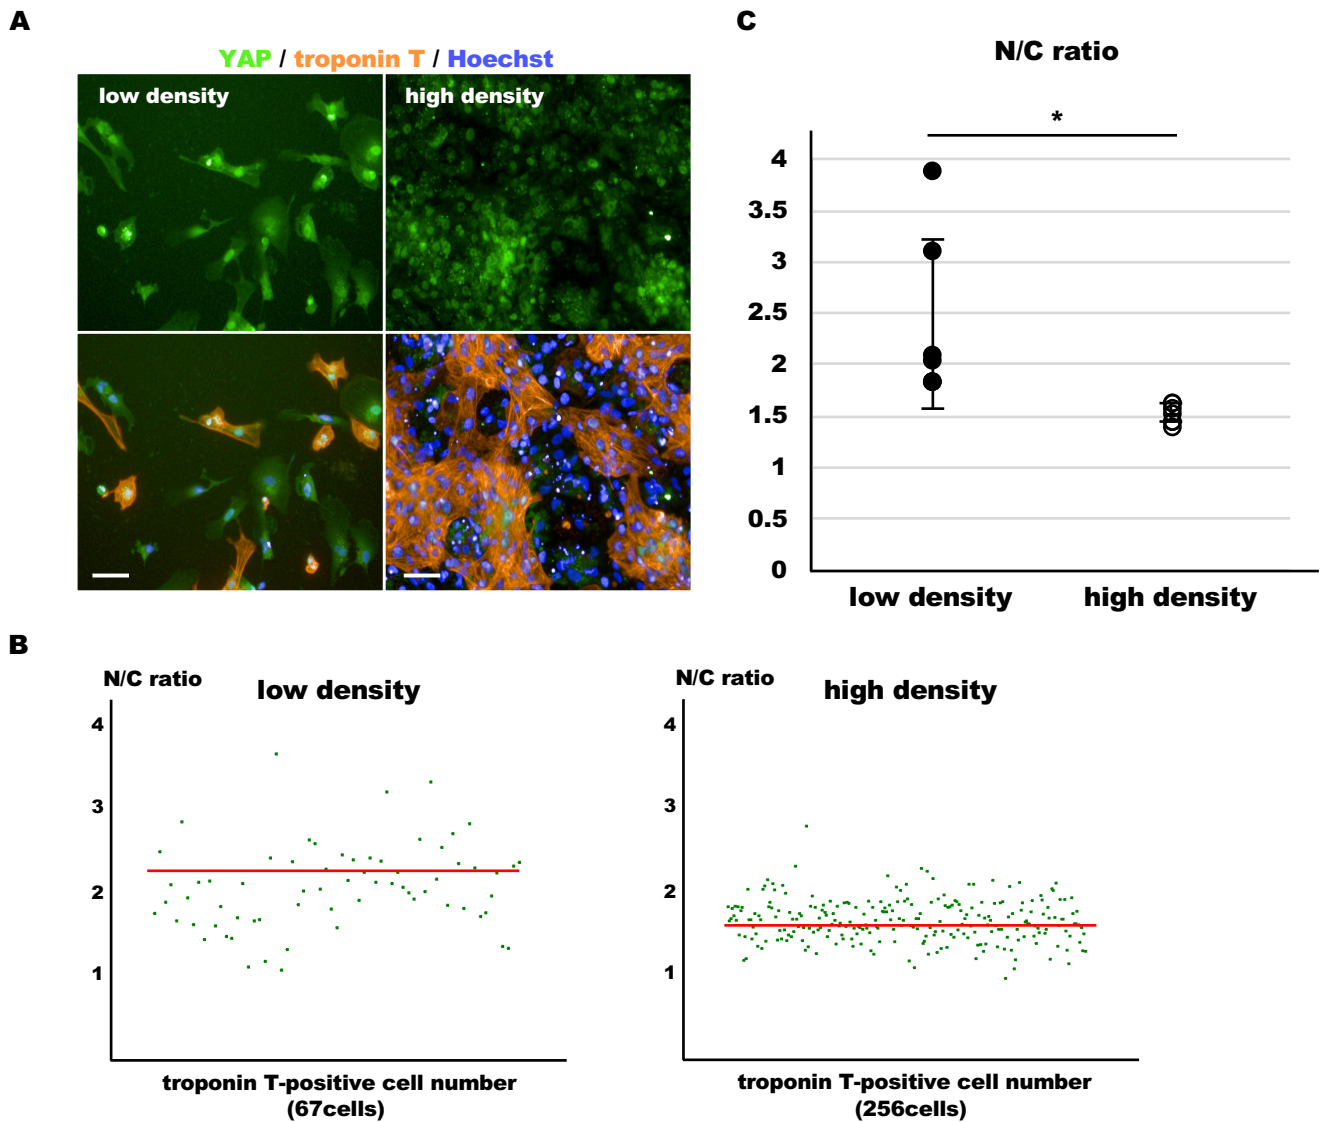

**Supplemental Figure III.** **A**, YAP localization was demonstrated using immunofluorescence staining in low and high cell densities (Scale bar: 50  $\mu$ m). **B**, Scatter plots of one field in low density and high density in Con-iPSC-CMs. Red bars indicate mean N/C ratio in troponin T-positive cells. **C**, N/C ratio in troponin T-positive cells was evaluated in low and high cell density ( $n = 7$  sessions, mean analyzed troponin T-positive cell number at low density:  $403 \pm 228$  cells, at high density:  $6906 \pm 1285$  cells, mean  $\pm$  SD;  $*P < 0.05$ ).

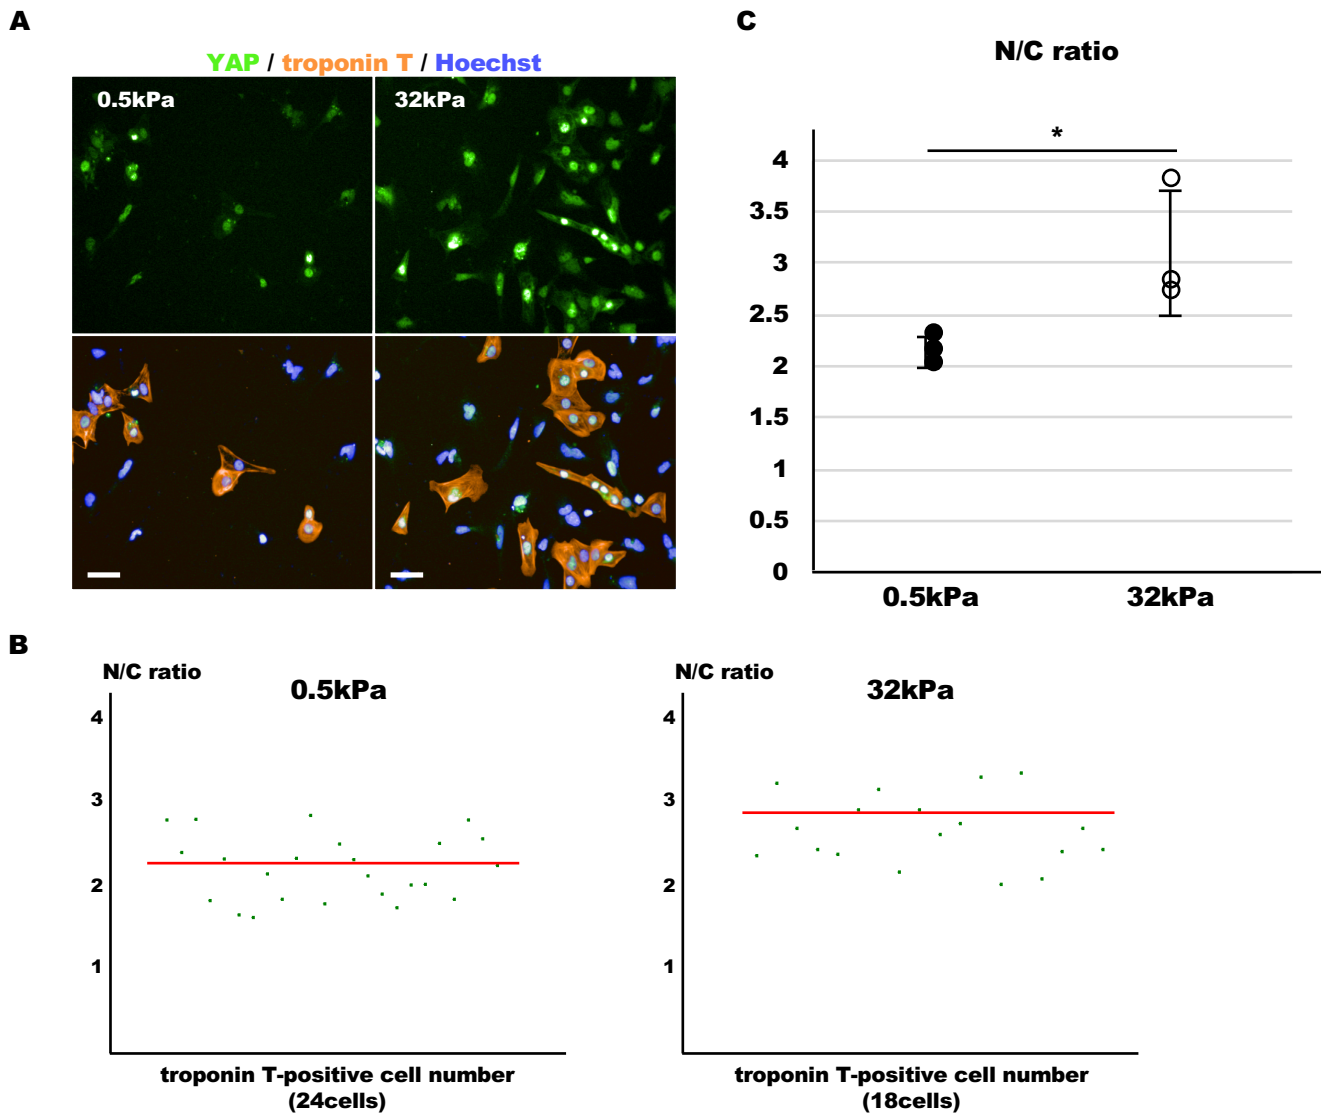

**Supplemental Figure IV.** **A**, YAP localization was demonstrated using immunofluorescence staining in soft substrate (0.5 kPa) and hard substrate (32 kPa) (Scale bar: 50  $\mu$ m). **B**, Scatter plots of one field in soft substrate (0.5 kPa) and hard substrate (32 kPa) in Con-iPSC-CMs. Red bars indicate mean N/C ratio in troponin T-positive cells. **C**, N/C ratio in troponin T-positive cells was evaluated in soft substrate (0.5 kPa) and hard substrate (32 kPa) ( $n = 3$  sessions, mean analyzed troponin T-positive cell number at 0.5 kPa:  $1535 \pm 664$  cells, at 32 kPa:  $1649 \pm 1493$  cells, mean  $\pm$  SD,  $*P < 0.05$ ).

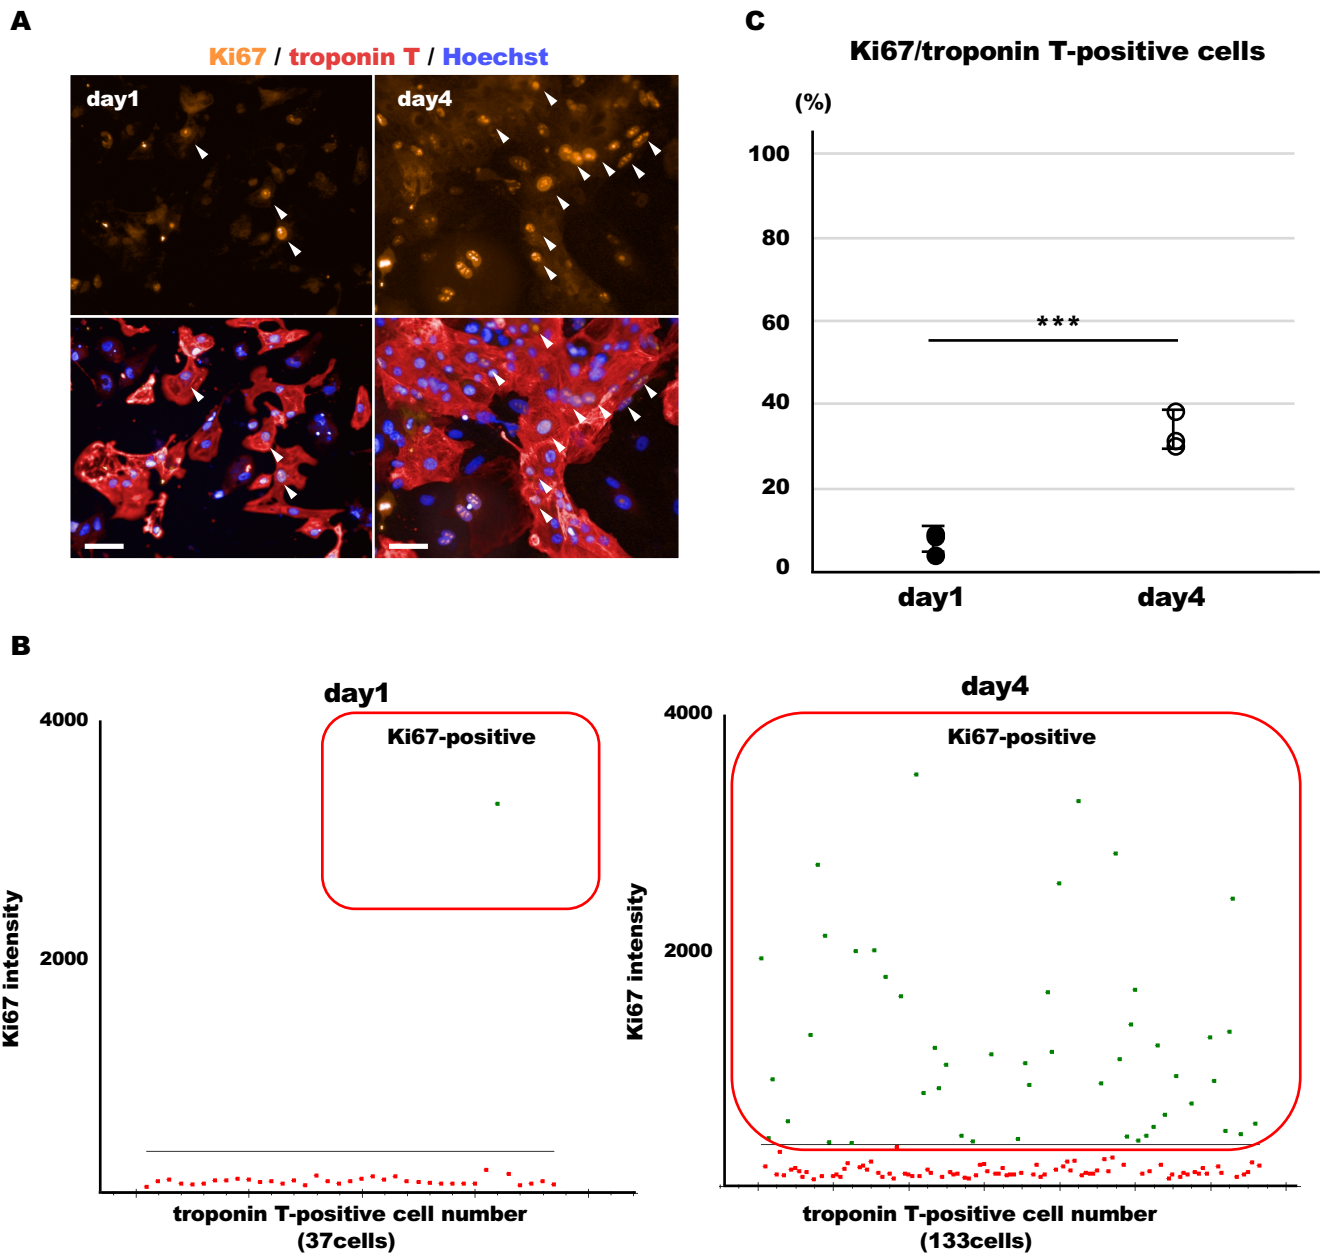

**Supplemental Figure V.** **A**, Ki67 expression was demonstrated using immunofluorescence staining in Con-iPSC-CMs, day1 and day4 from seeding. Arrowheads indicate Ki67-positive cells in troponin T-positive cells (Scale bar: 50  $\mu$ m). **B**, Scatter plots of one field in Con-iPSC-CMs according to the time course from seeding. Red frames indicate Ki67-positive cells in troponin T-positive cells. **C**, Percentage of Ki67-positive cells in troponin T-positive cells was evaluated in Con-iPSC-CMs day1 and day4 from seeding (n = 3 sessions, mean analyzed troponin T-positive cell number on day 1:  $1060 \pm 274$  cells, on day 4:  $3972 \pm 2129$  cells, mean  $\pm$  SD, \*\*\* $P < 0.001$ ).

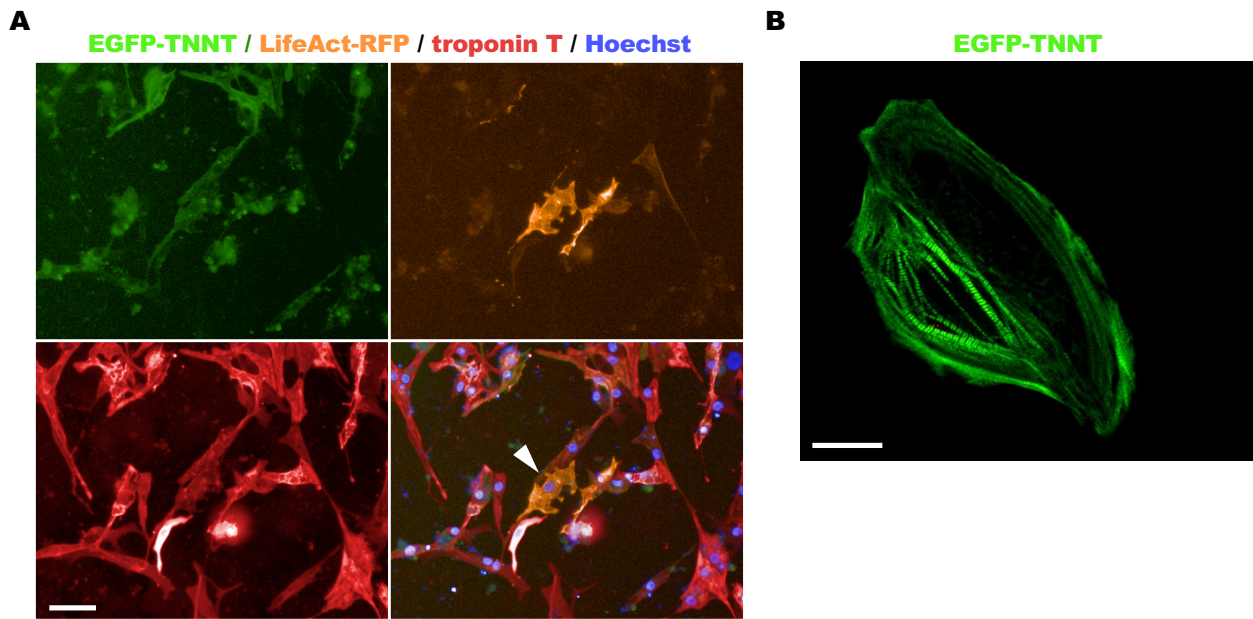

**Supplemental Figure VI. A**, Immunofluorescence image using troponin T of iPSC-CMs co-transfected with EGFP-TNNT and LifeAct-RFP (Scale bar: 50  $\mu\text{m}$ ). Arrowheads indicate both EGFP and RFP expression in troponin T-positive cells. **B**, EGFP-TNNT revealed a sarcomere structure in iPSC-CMs (Scale bar: 20  $\mu\text{m}$ ).

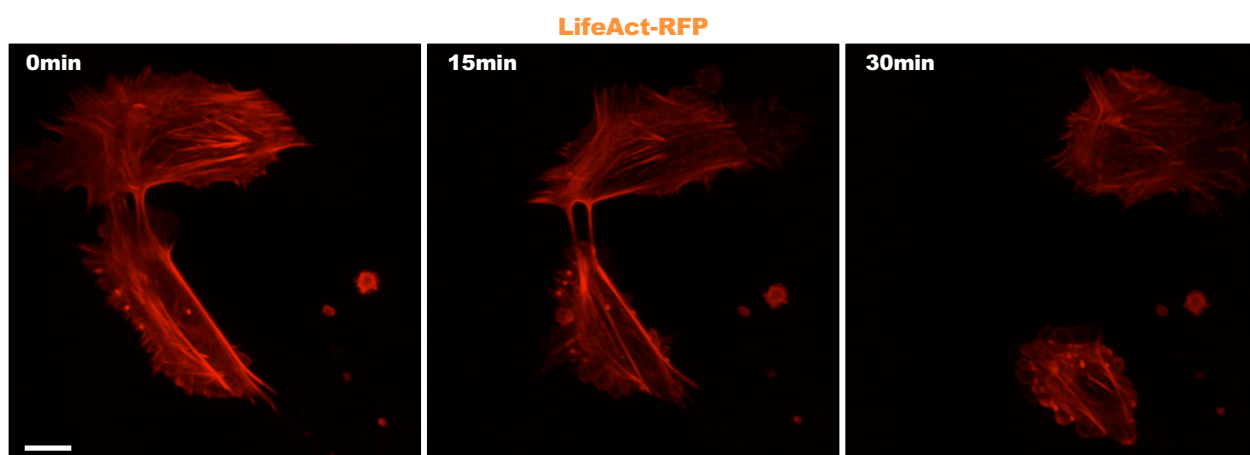

**Supplemental Figure VII.** The images demonstrate non-cardiomyocyte of iPSCs during cell division with actin dynamics (Scale bar: 10  $\mu\text{m}$ ) (Movie 1).



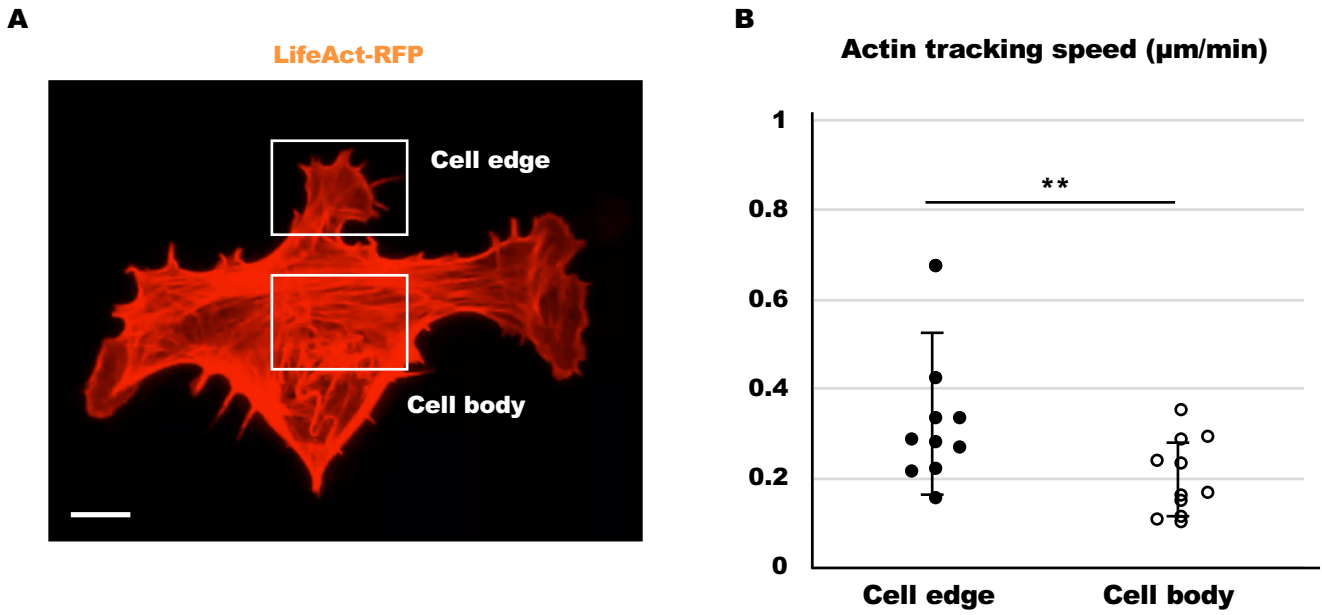

**Supplemental Figure VIII.** **A**, Actin dynamics in Con-iPSC-CMs was demonstrated using live cell imaging (Scale bar: 10  $\mu\text{m}$ ) (Movie 2). White squares frames show cell edge and cell body. **B**, Actin tracking speed was estimated at the cell edge and cell body (n = 4 sessions, 11 cells, mean  $\pm$  SD, \*\*P < 0.01).

**A**

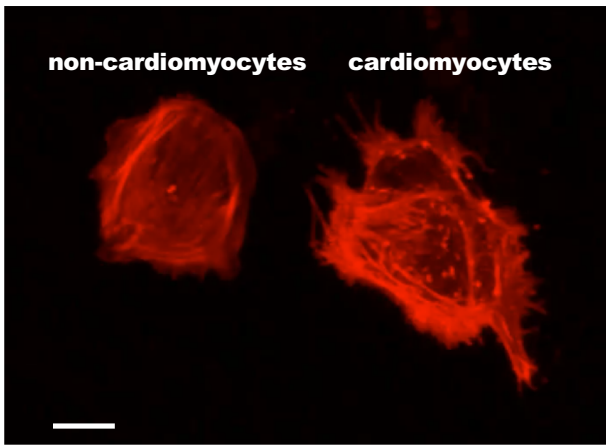

**B**

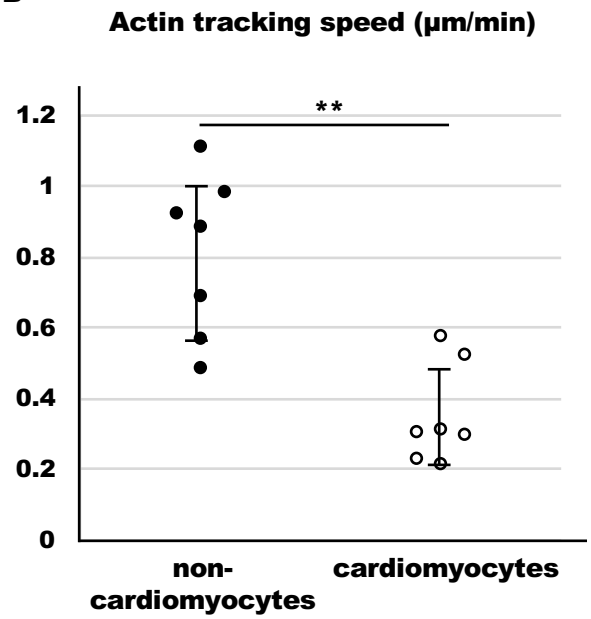

**Supplemental Figure IX. A**, The images demonstrate actin dynamics in non-cardiomyocytes and cardiomyocytes of Con-iPSCs (Scale bar: 10 µm) (Movie 3). **B**, Actin tracking speed was estimated at the cell edge of non-cardiomyocytes and cardiomyocytes (n = 3 sessions, 7 cells, mean ± SD, \*\*P < 0.01).

## Supplemental Table

| Target of sgRNA           | Sequence                  |
|---------------------------|---------------------------|
| Upstream of exon55        | caccGCAACAACCTCACCCCATTGT |
| Upstream of exon55-anti   | aaacACAATGGGGTGAGTTGTTGC  |
| Downstream of exon55      | caccGTAAGTGTAACTGACAAGCC  |
| Downstream of exon55-anti | aaacGGCTTGTCAGTTACAAGTAC  |

| Target of DMD exon | Sequence               |
|--------------------|------------------------|
| Exon 47 Forward    | GTCAATCAGCTCTGTGCTCA   |
| Exon 47 Reverse    | ACAACAATCCACATACCAGCCT |
| Exon 48 Forward    | GCCTTTGTGTAAGGTGTGTG   |
| Exon 48 Reverse    | CGTCAAATGGTCCTTCTTGG   |
| Exon 54 Forward    | TCCTGAAAGGTGGGTTACCT   |
| Exon 54 Reverse    | GTCTGAGCCAAGTCCGTGAGT  |
| Exon 55 Forward    | CCCCATACAAACGCCTTTAAG  |
| Exon 55 Reverse    | GTTTTGTCCCTGGCTTGTCAGT |
| Exon 46-56 Forward | GGAGGAAGCAGATAACATTGCT |
| Exon 46-56 Reverse | ACGTCTTTGTAACAGGACTGC  |
| Exon 47-56 Forward | AGTGCTCCCATAAGCCCAGAAG |
| Exon 47-56 Reverse | GCATCATCGGAACCTTCCAGG  |

**Supplemental Table 1. Designed sgRNA sequences for DMD-iPSCs and primers of genotyping for DMD-iPSCs**

| <b>Name</b>             | <b>Maker, Catalog number</b>       | <b>dilution</b> |
|-------------------------|------------------------------------|-----------------|
| Anti-Dystrophin         | Abcam, ab15277                     | 1:300           |
| Anti-Cardiac Troponin T | Abcam, ab8295                      | 1:300           |
| Anti-Cardiac Troponin T | Abcam, ab45932                     | 1:300           |
| Anti-Cardiac Troponin T | Abcam, ab64623                     | 1:300           |
| Anti-YAP1               | Santa Cruz Biotechnology, sc101199 | 1:200           |
| Ki67                    | Abcam, ab15580                     | 1:500           |

| <b>Name</b>                                  | <b>Maker, Catalog number</b>      | <b>dilution</b> |
|----------------------------------------------|-----------------------------------|-----------------|
| Alexa Fluor 488 donkey anti-mouse IgG (H+L)  | Thermo Fisher Scientific , A21202 | 1:300           |
| Alexa Fluor 568 donkey anti-rabbit IgG (H+L) | Thermo Fisher Scientific , A10042 | 1:300           |
| Alexa Fluor 647 donkey anti-goat IgG (H+L)   | Life technologies, A21447         | 1:300           |

**Supplemental Table 2. Immunofluorescence primary antibodies and second antibodies.**

| <b>Name</b>     | <b>Maker, Catalog number</b>       | <b>dilution</b> |
|-----------------|------------------------------------|-----------------|
| Anti-Dystrophin | Abcam, ab15277                     | 1:500           |
| Anti-YAP1       | Santa Cruz Biotechnology, sc101199 | 1:200           |
| GAPDH           | CST, 14C10                         | 1:10000         |

| <b>Name</b>                                           | <b>Maker, Catalog number</b> | <b>dilution</b> |
|-------------------------------------------------------|------------------------------|-----------------|
| Peroxidase AffiniPure Donkey<br>Anti-Rabbit IgG (H+L) | Jackson, 711-035-152         | 1:5000          |

**Supplemental Table 3. WB primary antibodies and second antibodies**
